# Supplementary material for: Energy aspect of the chemical bonding peculiarities in the crystal of sodium iodide dihydrate
Source: Royal Society of Chemistry journal article supplement (doi:10.1039/b704326k), 2007-01-01
Supplement: b704326k.pdf [file b704326k.pdf]

TABLE 1. MONOPOLE POPULATIONS, RADIAL PARAMETERS AND NET ATOMIC CHARGES.

| ATOM    | Pval  | KAPPA | P00   | KAPPA' | NET CHARGE |
|---------|-------|-------|-------|--------|------------|
| I (1)   | 7.909 | 0.939 | 0.000 | 1.337  | -0.908     |
| NA (1)  | 0.200 | 1.000 | 0.000 | 1.011  | +0.800     |
| O (1W)  | 6.065 | 0.995 | 0.000 | 0.935  | -0.065     |
| O (2W)  | 6.074 | 0.995 | 0.000 | 0.935  | -0.073     |
| H (2WB) | 0.897 | 1.200 | 0.000 | 1.200  | +0.102     |
| H (2WA) | 0.934 | 1.200 | 0.000 | 1.200  | +0.065     |
| H (1WB) | 0.952 | 1.200 | 0.000 | 1.200  | +0.047     |
| H (1WA) | 0.968 | 1.200 | 0.000 | 1.200  | +0.031     |

TABLE 2. DIPOLE POPULATION PARAMETERS.

| ATOM    | D11+        | D11-         | D10          | KAPPA' |
|---------|-------------|--------------|--------------|--------|
| I (1)   | 0.042 ( 32) | 0.008 ( 33)  | -0.078 ( 30) | 1.337  |
| NA (1)  | 0.691 (330) | 0.318 (265)  | -0.652 (229) | 1.011  |
| O (1W)  | 0.052 ( 21) | -0.060 ( 22) | -0.081 ( 24) | 0.935  |
| O (2W)  | 0.007 ( 21) | 0.004 ( 21)  | -0.026 ( 22) | 0.935  |
| H (2WB) | 0.000       | 0.000        | 0.175 ( 44)  | 1.200  |
| H (2WA) | 0.000       | 0.000        | 0.290 ( 56)  | 1.200  |
| H (1WB) | 0.000       | 0.000        | 0.191 ( 52)  | 1.200  |
| H (1WA) | 0.000       | 0.000        | 0.199 ( 43)  | 1.200  |

TABLE 3. QUADRUPOLE POPULATION PARAMETERS.

| ATOM    | Q20           | Q21+          | Q21-          | Q22+          | Q22-         | KAPPA' |
|---------|---------------|---------------|---------------|---------------|--------------|--------|
| I (1)   | 0.640 ( 229)  | 0.606 ( 330)  | -0.081 ( 265) | 0.149 ( 0)    | -0.032 ( 0)  | 1.337  |
| NA (1)  | -0.351 ( 248) | 0.307 ( 188)  | 0.414 ( 219)  | -0.033 ( 194) | 0.136 ( 251) | 1.011  |
| O (1W)  | -0.021 ( 172) | -0.009 ( 161) | 0.024 ( 151)  | 0.104 ( 150)  | 0.037 ( 175) | 0.935  |
| O (2W)  | -0.012 ( 0)   | -0.051 ( 0)   | -0.028 ( 0)   | 0.017 ( 0)    | 0.002 ( 0)   | 0.935  |
| H (2WB) | 0.000         | 0.000         | 0.000         | 0.000         | 0.000        | 1.200  |
| H (2WA) | 0.000         | 0.000         | 0.000         | 0.000         | 0.000        | 1.200  |
| H (1WB) | 0.000         | 0.000         | 0.000         | 0.000         | 0.000        | 1.200  |
| H (1WA) | 0.000         | 0.000         | 0.000         | 0.000         | 0.000        | 1.200  |

TABLE 4. OCTUPOLE POPULATION PARAMETERS.

| ATOM    | O30          | O31+          | O31-         | O32+          | O32-          | O33+         | O33-          | KAPPA' |
|---------|--------------|---------------|--------------|---------------|---------------|--------------|---------------|--------|
| I (1)   | -0.080 ( 24) | 0.015 ( 23)   | -0.008 ( 23) | -0.007 ( 23)  | 0.019 ( 23)   | 0.051 ( 23)  | 0.023 ( 23)   | 1.337  |
| NA (1)  | 0.110 ( 172) | -0.288 ( 161) | 0.251 ( 151) | -0.217 ( 150) | -0.350 ( 175) | 0.059 ( 161) | -0.017 ( 149) | 1.011  |
| O (1W)  | 0.078 ( 29)  | -0.015 ( 26)  | 0.003 ( 25)  | -0.004 ( 26)  | -0.004 ( 27)  | -0.001 ( 26) | -0.057 ( 26)  | 0.935  |
| O (2W)  | 0.061 ( 28)  | -0.009 ( 26)  | -0.019 ( 25) | 0.039 ( 26)   | -0.033 ( 26)  | -0.026 ( 26) | -0.038 ( 27)  | 0.935  |
| H (2WB) | 0.000        | 0.000         | 0.000        | 0.000         | 0.000         | 0.000        | 0.000         | 1.200  |
| H (2WA) | 0.000        | 0.000         | 0.000        | 0.000         | 0.000         | 0.000        | 0.000         | 1.200  |
| H (1WB) | 0.000        | 0.000         | 0.000        | 0.000         | 0.000         | 0.000        | 0.000         | 1.200  |
| H (1WA) | 0.000        | 0.000         | 0.000        | 0.000         | 0.000         | 0.000        | 0.000         | 1.200  |

TABLE 5. HEXADECAPOLE POPULATION PARAMETERS.

| ATOM    | H40          | H41+        | H41-         | H42+         | H42-         | H43+         | H43-        | H44+        | H44          |
|---------|--------------|-------------|--------------|--------------|--------------|--------------|-------------|-------------|--------------|
| I (1)   | -0.328 ( 39) | 0.391 ( 35) | -0.253 ( 36) | -0.281 ( 36) | -0.029 ( 37) | -0.093 ( 37) | 0.065 ( 37) | 0.062 ( 35) | -0.127 ( 35) |
| NA (1)  | 0.000        | 0.000       | 0.000        | 0.000        | 0.000        | 0.000        | 0.000       | 0.000       | 0.000        |
| O (1W)  | 0.000        | 0.000       | 0.000        | 0.000        | 0.000        | 0.000        | 0.000       | 0.000       | 0.000        |
| O (2W)  | 0.000        | 0.000       | 0.000        | 0.000        | 0.000        | 0.000        | 0.000       | 0.000       | 0.000        |
| H (2WB) | 0.000        | 0.000       | 0.000        | 0.000        | 0.000        | 0.000        | 0.000       | 0.000       | 0.000        |
| H (2WA) | 0.000        | 0.000       | 0.000        | 0.000        | 0.000        | 0.000        | 0.000       | 0.000       | 0.000        |
| H (1WB) | 0.000        | 0.000       | 0.000        | 0.000        | 0.000        | 0.000        | 0.000       | 0.000       | 0.000        |
| H (1WA) | 0.000        | 0.000       | 0.000        | 0.000        | 0.000        | 0.000        | 0.000       | 0.000       | 0.000        |

```

loop_
  _atom_local_axes_label
  _atom_local_axes_atom0
  _atom_local_axes_ax1
  _atom_local_axes_atom1
  _atom_local_axes_atom2
  _atom_local_axes_ax2
I(1)      Na(1)      Z      I(1)      O(1W)      Y
Na(1)     O(1W)      Z      Na(1)     H(1WA)     Y
O(1W)     H(1WA)     Z      O(1W)     H(1WB)     Y
O(2W)     H(2WA)     Z      O(2W)     H(2WB)     Y
H(2WB)    O(2W)      Z      H(2WB)    H(2WA)     Y
H(2WA)    O(2W)      Z      H(2WA)    H(2WB)     Y
H(1WB)    O(1W)      Z      H(1WB)    H(1WA)     Y
H(1WA)    O(1W)      Z      H(1WA)    H(1WB)     Y

```

---

```

loop_
  _atom_site_label
  _atom_site_fract_x
  _atom_site_fract_y
  _atom_site_fract_z
  _atom_site_occupancy
  _atom_site_U_iso_or_equiv
I(1)      1.13489(3)    0.87695(3)    0.22314(2)    1.0000  0.015
NA(1)     0.81829(8)    0.64202(7)    0.48137(6)    1.0000  0.017
O(1W)     0.3822(1)     0.5121(1)     0.2877(1)     1.0000  0.019
O(2W)     0.2152(1)     0.7205(1)     0.7113(1)     1.0000  0.018
H(2WB)    0.38099        0.85051        0.73065        1.0000  0.028
H(2WA)    0.20380        0.74658        0.85253        1.0000  0.050
H(1WB)    0.27349        0.37841        0.15078        1.0000  0.045
H(1WA)    0.34881        0.63408        0.28214        1.0000  0.033

```

---

```

loop_
  _atom_site_aniso_label
  _atom_site_aniso_U_11
  _atom_site_aniso_U_22
  _atom_site_aniso_U_33
  _atom_site_aniso_U_12
  _atom_site_aniso_U_13
  _atom_site_aniso_U_23
I(1)      0.01457(5)    0.01223(4)    0.01187(4)    0.00611(4)    0.00502(4)    0.00526(4)
NA(1)     0.0127(1)     0.0144(1)     0.0154(1)     0.0069(1)     0.0053(1)     0.0073(1)
O(1W)     0.0148(2)     0.0171(2)     0.0157(1)     0.0081(1)     0.0039(1)     0.0078(1)
O(2W)     0.0134(1)     0.0155(1)     0.0141(1)     0.0055(1)     0.0053(1)     0.0048(1)

```

---

```

data_FFT
  _refine_diff_density_max    0.239
  _refine_diff_density_min    -0.422
  _refine_diff_density_rms    0.047

```

---

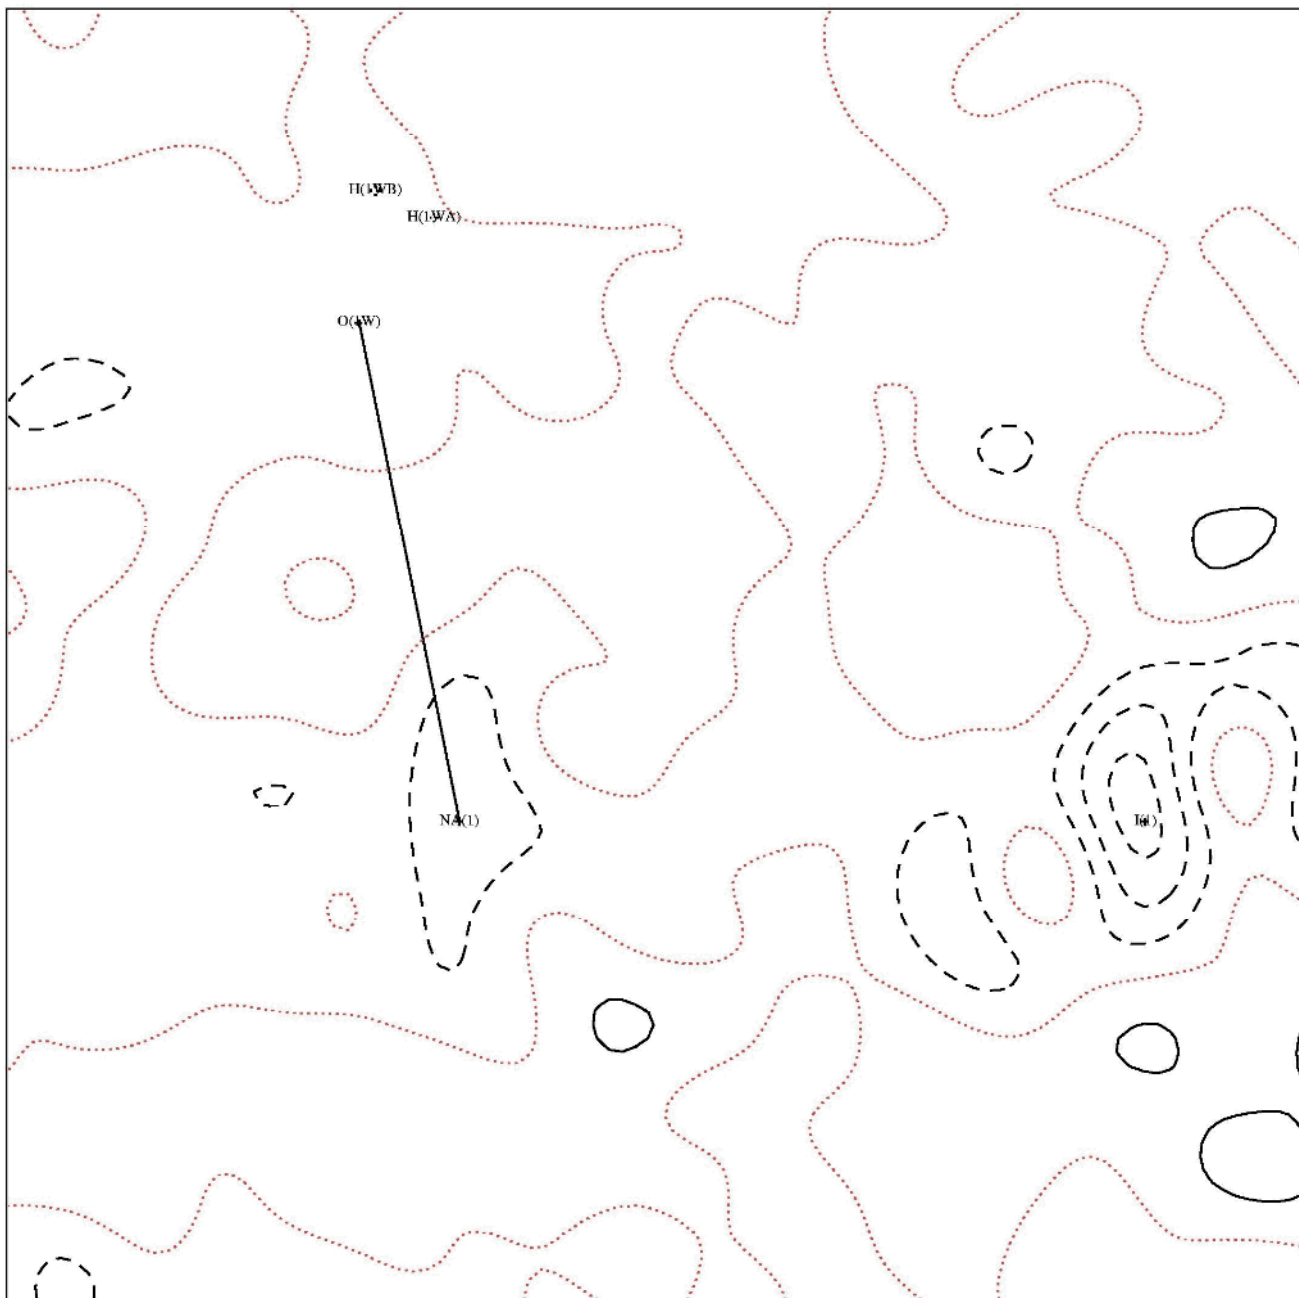

The residual electron density map in the plane formed by O(1W), Na(1) and I(1) atoms. Contours are drawn with  $0.1 \text{ e}\text{\AA}^{-3}$  step, the negative ones are dashed, the zero contour is drawn by a red dot line.
